# Supplementary material
Source: Springer Nature journal article supplement (https://www.springermedizin.de/resource/supplementary/13223_2014_525_MOESM4_ESM.pdf/9596726)

**a) Baseline characteristics:**

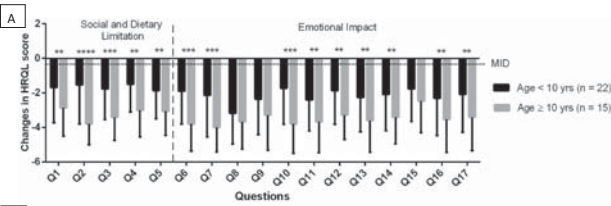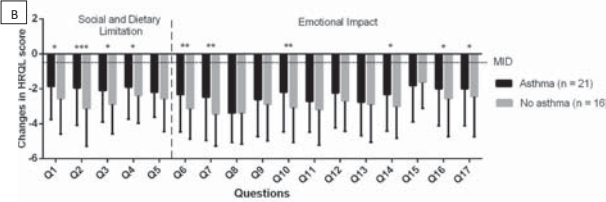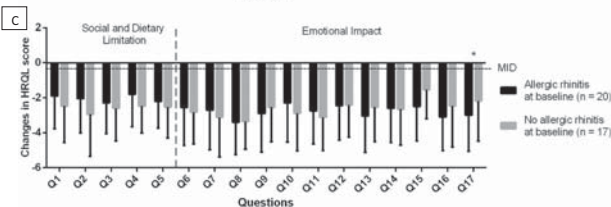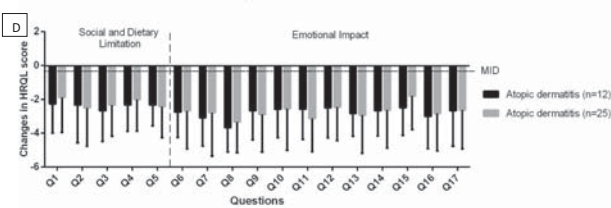

**b) Adverse effects of therapy:**

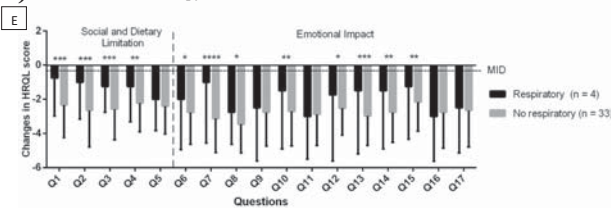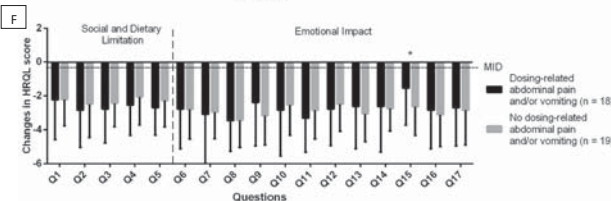

**c) Number and type of food allergens:**

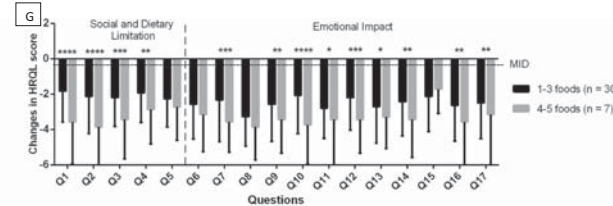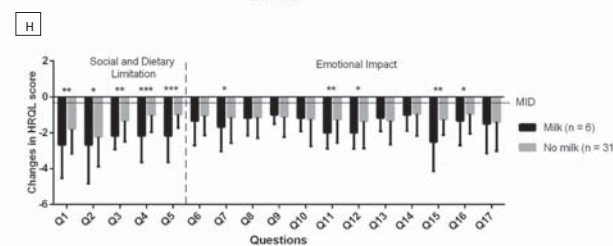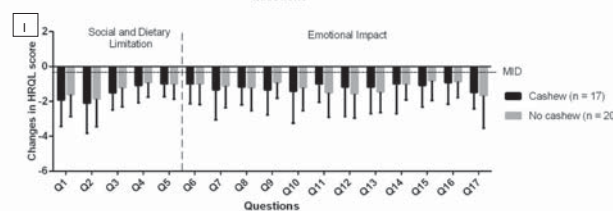

Supplement: MOESM4 [file 9596726]
